# Supplementary material for: Whistling in caterpillars (Amorpha juglandis, Bombycoidea): sound-producing mechanism and function
Source: Oxford University Press journal article supplement (doi:10.1242/jeb.046805), 2010-12-08
Supplement: jeb046805tables1.pdf [file jeb046805tables1.pdf]

Table S1. Abdominal spiracle sizes in mm (means  $\pm$  s.d.) for *A. juglandis* and *P. myops*

|                            | A1              | A2              | A3              | A4              | A5              | A6              | A7              | A8              |
|----------------------------|-----------------|-----------------|-----------------|-----------------|-----------------|-----------------|-----------------|-----------------|
| <i>A. juglandis</i> length | 0.59 $\pm$ 0.05 | 0.63 $\pm$ 0.06 | 0.65 $\pm$ 0.06 | 0.67 $\pm$ 0.06 | 0.67 $\pm$ 0.05 | 0.69 $\pm$ 0.06 | 0.76 $\pm$ 0.08 | 0.95 $\pm$ 0.07 |
| <i>A. juglandis</i> width  | 0.23 $\pm$ 0.03 | 0.27 $\pm$ 0.05 | 0.30 $\pm$ 0.04 | 0.29 $\pm$ 0.06 | 0.31 $\pm$ 0.03 | 0.32 $\pm$ 0.03 | 0.36 $\pm$ 0.03 | 0.34 $\pm$ 0.02 |
| <i>P. myops</i> length     | 0.53 $\pm$ 0.04 | 0.60 $\pm$ 0.04 | 0.62 $\pm$ 0.04 | 0.61 $\pm$ 0.06 | 0.61 $\pm$ 0.05 | 0.64 $\pm$ 0.05 | 0.68 $\pm$ 0.07 | 0.70 $\pm$ 0.06 |
| <i>P. myops</i> width      | 0.24 $\pm$ 0.02 | 0.29 $\pm$ 0.04 | 0.26 $\pm$ 0.02 | 0.27 $\pm$ 0.02 | 0.27 $\pm$ 0.02 | 0.28 $\pm$ 0.03 | 0.27 $\pm$ 0.03 | 0.31 $\pm$ 0.04 |
